# Supplementary material for: TRIM37 prevents formation of centriolar protein assemblies by regulating Centrobin
Source: eLife. 2021 Jan 25;10:e62640. doi: 10.7554/eLife.62640 (PMC7870141; doi:10.7554/eLife.62640)
Supplement: Figure 1—source data 1. [file elife-62640-fig1-data1.xlsx]

## Sheet: Sheet1
Figure 1C - source data
	% cells with extra Centrin-1:GFP foci positive for CEP63 or HsSAS-6
	Exp 1	Exp 2
siControl	4	2
siTRIM37	18	12
RO3306	96	98
Figure 1E - source data
		% interphase cells with extra single focus			% interphase cells with extra pairs of foci
		Exp 1	Exp 2	Exp 3	Exp 1	Exp 2	Exp 3
siTRIM37	0h	8	2	4	2	0	2
siTRIM37	24h	10	34	24	2	6	8
siTRIM37	48h	44	62	32	14	10	10
siTRIM37	72h	38	46	46	22	50	22
Figure 1G - source data
	% mitotic cells with >2 MTOCs
	Exp 1	Exp 2	Exp 3
siControl	2	2	12
siTRIM37	48	40	34
Figure 1 - Supplement 2B - source data
			% cells with extra CP110 foci
siTRIM37	plasmid		Exp 1	Exp 2
-	pcDNA3		16	6
+	pcDNA3		56	48
+	pcDNA3-TRIM37:GFP		16	26
+	pcDNA3-TRIM37:NES:GFP		22	24
Figure 1 - Supplement 2E - source data
	# cells with TRIM37 at the centrosome			total # cells
G1	5			50
G2/M	56			90
