# Supplementary material for: TRIM37 prevents formation of centriolar protein assemblies by regulating Centrobin
Source: eLife. 2021 Jan 25;10:e62640. doi: 10.7554/eLife.62640 (PMC7870141; doi:10.7554/eLife.62640)
Supplement: Figure 2—source data 1. [file elife-62640-fig2-data1.xlsx]

## Sheet: Sheet1
Figure 2B - source data
	% mitotic cells with extra Centrin-2 foci			% mitotic cells with extra γ-Tubulin foci
	Exp 1	Exp 2	Exp 3	Exp 1	Exp 2	Exp 3
Control	0	0	0	0	0	0
P-1	18.5185	41.1765	53.8462	14.8148	17.6471	23.0769
P-2	66.6667	62.5	85.7143	64.1026	37.5	71.4286
Figure 2D - source data
	% metaphase cells with bipolar spindle
	Exp 1	Exp 2	Exp 3
Control	100	100	100
P-2	42.1875	49.2308	46.0318
Figure 2E - source data
	% metaphase cells with extra Centrin-2 foci
	Exp 1	Exp 2	Exp 3
Control	2.6	2.7	0
P-2	95.3125	76.9231	80.9524
Figure 2G- source data
	% anaphase cells with bipolar spindle
	Exp 1	Exp 2	Exp 3
Control	100	100	100
P-2	79.1667	88	83.3333
Figure 2H - source data
	% anaphase cells with chromosome missegregation
	Exp 1	Exp 2	Exp 3
Control	6.25	0	0
P-2	20.8333	12	12.5
Figure 2J - source data
	% interphase cells with micronuclei
	Exp 1	Exp 2	Exp 3
Control	0.462963	0.980392	0
P-2	10.0503	9.45274	8.61244
