# Supplementary material for: TRIM37 prevents formation of centriolar protein assemblies by regulating Centrobin
Source: eLife. 2021 Jan 25;10:e62640. doi: 10.7554/eLife.62640 (PMC7870141; doi:10.7554/eLife.62640)
Supplement: Figure 4—source data 1. [file elife-62640-fig4-data1.xlsx]

## Sheet: Sheet1
Figure 4C - source data
		HeLa cells + siTRIM37
# Centrobin structures		Exp 1	Exp 2	Exp 3
1		64	76	63
2		14	10	13
3		2	0	3
>3		1	0	0
Figure 4E - source data
		% intherphase cells with Centrobin structures
		Exp 1	Exp 2	Exp 3
siConttrol		0	0	0
siTRIM37		72	86	74
siTRIM37 + siPLK4		84	72	74
siTRIM37 + siCentrobin		0	0	0
Figure 4G - source data
inter-stripe-distance
CLEM	UExM
0.064	0.051277
0.056	0.061277
0.052	0.074894
0.064	0.091489
0.063	0.078723
0.065	0.063404
0.057	0.073404
0.065	0.069362
0.061	0.069362
0.061	0.060851
0.063	0.051064
0.065	0.05766
0.071	0.052979
0.062	0.057021
0.0877551	0.056596
0.0967033	0.054468
0.105338	0.057447
0.0792779	0.053191
0.0811617	0.079787
0.0883831	0.062128
0.0857143	0.073191
0.0993721	0.080851
0.0877551	0.080426
0.0902669	0.07766
0.067	0.080426
0.073	0.073191
0.056	0.089362
0.053	0.080426
0.056	0.068723
0.053	0.079362
0.061
0.071
0.075
0.067
0.06
0.0630528
0.0686749
0.0608548
0.0633977
0.0655099
0.0630528
0.0653432
0.0587607
0.0546304
0.0594983
0.0697674
0.0930233
0.0930233
0.0930233
0.0930233
0.0930233
0.0930233
Figure 4K - source data
		Relative Centrobin protein levels
siTRIM37	time (h)	Exp 1	Exp 2
-	0	1	1
-	8	0.572066	0.468459
+	0	1	1
+	8	1.044	0.988344
Figure 4 - Supplement 1B - source data
	% intherphase cells with Centrobin structures
	Exp 1	Exp 2	Exp 3
siControl	0	0	0
siTRIM37	81	87	83
Figure 4 - Supplement 1I - source data
mean PLK4 intensity in Centrobin structures (relative units)
siTRIM37	siTRIM37 + siPLK4
0.446993	0.528363
0.533788	0.696528
0.65964	0.75837
0.74535	0.426379
0.455673	0.739926
0.50124	0.807192
0.769219	0.530533
0.848419	0.818041
0.654216	0.500155
0.878797	0.811531
0.850589	0.445908
0.82889	0.483881
0.722567	0.594544
0.862523	0.462182
1.0014	0.724737
0.734501	0.786578
1.35508	0.944978
0.908091	0.539213
1.24985	0.675914
1.01224	0.773559
1.04045	0.448078
1.04154	0.858183
1.21838	0.431804
0.937384	0.58695
0.640112	0.49473
0.65747	0.774644
0.676999	0.781153
0.814786	0.66615
0.853844	1.82594
0.818041	0.873373
0.933044	0.963422
0.840824	0.594544
0.895071	1.04154
1.52542	1.20102
1.01441	1.40933
1.29975	1.10446
1.56882	0.470862
1.37678	0.57827
1.1381	1.0296
1.30084	0.930874
1.25852	1.14786
1.43862	0.887477
1.61438	1.01224
1.0947	1.14786
1.80316	1.04588
1.39523	1.07842
1.22381	1.25852
1.60679	0.644451
0.804342	1.25153
0.898382	1.4166
0.546233	1.50464
0.391166	1.29155
0.466198	0.622265
0.84536	1.49864
0.53923	1.82578
0.639272	0.825351
1.47263	1.44361
0.767327	1.31456
1.21252	1.53465
0.954406	1.80677
1.10647	1.4226
1.28154	1.21652
1.71273	1.4106
1.06145	1.6407
0.997424	0.884376
1.15249	1.13048
1.20951	1.69872
0.947403	1.4156
1.09647	1.82678
0.928395	1.10947
1.06245	1.68172
0.627267	1.25253
0.786335	1.21852
0.858365	1.31956
1.04044	0.781332
1.05145	0.975415
0.96341	0.861367
1.43761	0.887378
1.4146	1.16149
0.745317	1.22852
0.780332	0.899383
0.72931	0.731311
1.29055	0.935398
1.07746	1.45562
1.29755	1.4056
1.1765	1.63369
1.67471	1.53465
1.10647	1.26454
1.15749	0.973414
1.09046	1.80677
1.26154	1.68972
1.4076	0.945402
0.499212	1.08746
0.785334	1.47263
0.647275	1.1745
	0.980417
	1.1695
	1.30956
	1.06545
	1.62769
	1.57167
Figure 4 - Supplement 1J - source data
Centrobin structuress size (relative area)
siTRIM37	siTRIM37 + siPLK4
0.9	0.3
0.9	0.8
1.7	0.8
0.8	0.5
3	0.9
2.1	0.3
0.9	1
1.9	0.4
2	0.3
1.2	0.8
0.7	0.5
1.1	0.5
2.9	0.7
0.9	0.2
1.1	2.2
1.2	1
0.9	0.2
1.1	0.8
1.1	0.6
0.5	0.4
0.5	0.5
0.2	0
1.1	1.3
0.5	0.5
0.9	0.4
1.1	0.6
1.4	0.4
0.5	0.6
1.2	1
1.9	1.1
0.5	1
1.3	0.6
1.2	1.1
1.1	0.7
0.5	0.6
0.5	0.8
0.9	1.2
1.7	1.5
0.8	0.4
0.1	0.6
0.5	0.5
0.6	0.5
1.5	0.3
0.4	0.2
1	1
1.3	1.3
0.8	0.5
0.4	0.7
0.6	0.5
0.3	0.6
0.8	0.5
0.7	0.6
1.5	0.5
1.4	0.5
0.4	1
0.5	0.3
1.1	0.8
1.4	0.8
0.3	0.5
1.7	0.9
0.7	0.7
0.9	1.5
1.6	0.8
1	0.5
0.3	0.6
	0.9
	1
	0.6
	0.4
	0.7
Figure 4 - Supplement 2A - source data
	TRIM37 mRNA levels		Centrobin mRNA levels
	Exp 1	Exp 2	Exp 1	Exp 2
siControl	100	100	100	100
siTRIM37	25.18	18.6	76.54	80.35
