# Supplementary material for: TRIM37 prevents formation of centriolar protein assemblies by regulating Centrobin
Source: eLife. 2021 Jan 25;10:e62640. doi: 10.7554/eLife.62640 (PMC7870141; doi:10.7554/eLife.62640)
Supplement: Figure 5—source data 1. [file elife-62640-fig5-data1.xlsx]

## Sheet: Sheet1
Figure 5B - source data
	% cells with Centrobin structures
	Exp 1	Exp 2	Exp 3
Control	0	0	0
P-2	74	64	62
Figure 5D - source data
	% metaphase cells with Centrobin structures
	Non MTOCs			MTOCs
	Exp 1	Exp 2	Exp 3	Exp 1	Exp 2	Exp 3
Control	0	0	0	0	0	0
P-2	12.5	20	15.873	82.8125	73.8462	77.7778
Figure 5F - source data
			% TRIM37 depleted cells with Centrobin structures
			without Cenpas			with Cenpas
time post-transfection (h)			Exp 1	Exp 2	Exp 3	Exp 1	Exp 2	Exp 3
0			0	0	0	0	0	0
24			20	30	20	4	6	2
26			14	30	40	8	24	14
28			46	40	40	18	46	32
32			56	40	38	52	60	46
Figure 5H - source data
			% miotic cells with >4 centrioles
			Exp 1	Exp 2	Exp 3
siControl			4	4	4
siTRIM37			72	68	60
Centrobin-ko			2	10	4
Centrobin-ko + siTRIM37			32	22	24
Figure 5 - Supplement 1B - source data
	% miotic cells with >3 centrioles			% miotic cells with 3 or 4 centrioles			% miotic cells with >4 centrioles
	Exp 1	Exp 2	Exp 3	Exp 1	Exp 2	Exp 3	Exp 1	Exp 2	Exp 3
siControl	6	4	6	88	80	92	6	16	2
siCentrobin	0	6	20	96	80	78	4	14	2
Figure 5 - Supplement 1D - source data
		% miotic cells with >4 centrioles
		Exp 1	Exp 2
siControl		6	16
siTRIM37		66	56
siCentrobin		4	14
siCentrobin + siTRIM37		34	24
