# Supplementary material for: TRIM37 prevents formation of centriolar protein assemblies by regulating Centrobin
Source: eLife. 2021 Jan 25;10:e62640. doi: 10.7554/eLife.62640 (PMC7870141; doi:10.7554/eLife.62640)
Supplement: Figure 6—source data 1. [file elife-62640-fig6-data1.xlsx]

## Sheet: Sheet1
Figure 6A - source data
	Number of centrioles + Cenpas																Number of centrioles + Cenpas
	Exp1	Exp1	Exp1	Exp1	Exp1	Exp1	Exp1	Exp1	Exp1	Exp1	Exp1	Exp1	Exp1	Exp1	Exp1	Exp1	Exp2	Exp2	Exp2	Exp2	Exp2	Exp2	Exp2	Exp2	Exp2	Exp2	Exp2	Exp2	Exp2	Exp2	Exp2	Exp2
	HeLa	HeLa	HeLa	HeLa	HeLa	HeLa	HeLa	HeLa	HeLa	HeLa	HeLa	HeLa	RPE-1	RPE-1	RPE-1 HsSAS-6-ko	RPE-1 HsSAS-6-ko	HeLa	HeLa	HeLa	HeLa	HeLa	HeLa	HeLa	HeLa	HeLa	HeLa	HeLa	HeLa	RPE-1	RPE-1	RPE-1 HsSAS-6-ko	RPE-1 HsSAS-6-ko
	siControl	siTRIM37	Centrinone	siHsSAS-6	siSTIL	siCPAP	siSPICE	Centrinone + siTRIM37	siTRIM37 + siHsSAS-6	siTRIM37 + siSTIL	siTRIM37 + siCPAP	siTRIM37 + siSPICE	siControl	siTRIM37	siControl	siTRIM37	siControl	siTRIM37	Centrinone	siHsSAS-6	siSTIL	siCPAP	siSPICE	Centrinone+siTRIM37	siTRIM37 + siHsSAS-6	siTRIM37 + siSTIL	siTRIM37 + siCPAP	siTRIM37 + siSPICE	siControl	siTRIM37	siControl	siTRIM37
Cell 1	3	7	1	1	0	1	3	1	3	5	7	4	4	7	0	4	4	4	2	2	2	1	4	1	4	4	3	3	4	5	0	4
Cell 2	3	4	1	1	1	2	4	4	4	2	2	7	4	7	0	3	4	4	1	0	1	1	2	2	3	3	1	6	4	5	0	0
Cell 3	4	8	1	2	3	1	4	2	3	4	0	4	5	7	0	2	4	5	1	2	0	1	4	2	4	6	2	4	4	4	0	6
Cell 4	4	10	1	2	1	1	1	1	0	5	7	1	4	4	0	4	5	4	2	1	1	1	2	1	1	5	6	4	4	5	0	1
Cell 5	4	4	2	2	0	2	3	1	1	5	2	7	4	7	0	0	4	6	0	3	1	0	4	2	5	5	4	3	4	4	0	2
Cell 6	5	4	0	1	5	0	5	1	4	3	5	1	4	6	0	2	3	6	0	3	0	0	3	2	4	5	4	3	4	6	0	4
Cell 7	4	6	0	1	3	1	4	1	4	4	1	6	4	7	3	4	4	5	0	4	2	0	3	1	6	5	1	2	4	6	0	3
Cell 8	4	4	0	1	4	4	4	2	3	5	5	2	4	4	0	0	4	4	0	2	3	2	5	1	2	3	4	1	4	5	0	2
Cell 9	6	5	0	1	0	4	4	1	5	9	3	5	4	6	0	4	4	6	0	6	2	2	4	1	5	4	5	7	3	4	0	1
Cell 10	3	4	0	2	0	4	2	1	2	4	7	4	4	6	0	1	4	4	0	1	2	2	5	2	2	2	4	4	6	5	0	1
Cell 11	4	4	0	0	2	2	4	0	2	5	4	4	4	4	0	0	4	6	0	2	2	0	3	1	4	4	4	8	4	6	0	3
Cell 12	6	4	0	1	2	3	1	0	2	10	13	5	4	4	0	3	3	4	0	2	0	0	4	2	4	4	2	3	3	4	0	1
Cell 13	4	5	0	1	4	0	2	0	2	5	7	5	4	10	0	1	4	3	0	2	0	1	1	1	4	2	3	9	3	5	0	1
Cell 14	4	6	0	2	3	1	4	0	5	5	8	6	4	5	0	5	3	2	0	1	1	0	1	0	5	6	3	4	4	5	0	0
Cell 15	4	5	0	1	1	1	2	0	0	9	6	1	4	4	0	1	4	5	0	3	1	3	2	0	5	4	7	4	3	4	0	4
Cell 16	4	4	0	0	3	0	4	0	2	5	4	2	4	7	0	4	4	4	0	1	4	2	4	0	5	3	5	6	4	5	0	4
Cell 17	4	5	0	1	2	2	3	0	2	4	3	5	4	6	0	0	3	4	0	0	1	3	2	0	5	4	5	4	4	7	0	0
Cell 18	3	4	0	1	2	0	4	0	2	4	4	3	4	7	0	0	3	5	0	0	0	0	4	0	2	4	5	6	4	5	0	2
Cell 19	4	5	0	0	2	2	3	0	2	8	3	4	4	9	0	0	4	7	0	2	2	1	2	0	2	4	4	5	3	6	0	0
Cell 20	4	5	0	1	3	2	3	0	1	6	6	8	4	8	0	4	4	4	0	2	4	1	1	0	3	4	7	8	4	4	0	1
Cell 21	4	5	0	1	0	0	5	0	4	3	3	7	4	7	0	0	4	5	0	3	2	0	2	0	6	4	3	8	4	6	0	1
Cell 22	4	5	0	0	0	1	4	0	0	8	6	3	3	7	0	4	4	4	0	1	2	1	2	0	4	3	5	2	4	4	0	4
Cell 23	3	7	0	1	4	2	3	0	2	3	4	4	4	6	1	0	4	2	0	1	0	1	1	0	4	5	2	7	4	4	0	1
Cell 24	4	4	0	2	4	0	4	0	1	4	7	5	4	4	0	0	6	4	0	1	2	1	4	0	5	4	3	3	4	4	0	3
Cell 25	4	4	0	4	4	3	4	0	2	9	3	5	4	5	0	5	4	4	0	0	2	1	4	0	4	5	2	8	4	6	0	3
Cell 26	3	5	0	2	1	2	1	0	4	4	2	9	4	5	0	3	4	6	0	1	3	1	3	0	2	8	3	5	4	6	0	2
Cell 27	3	6	0	2	0	0	3	0	2	5	3	8	4	6	0	4	4	4	0	0	6	0	0	0	4	4	4	9	3	6	0	2
Cell 28	4	4	0	2	4	0	2	0	2	2	3	4	4	7	0	2	4	5	0	0	6	0	3	0	4	5	5	0	3	4	0	3
Cell 29	4	4	0	1	4	1	1	0	2	2	4	4	4	6	0	0	4	4	0	1	3	0	1	0	5	4	2	9	3	5	0	0
Cell 30	4	9	0	1	3	1	4	0	0	6	3	6	4	5	0	0	4	6	0	5	0	1	5	0	4	4	4	8	4	6	0	2
Cell 31	3	3	0	1	2	0	3	0	0	4	2	3	4	4	0	0	4	5	0	0	1	0	4	0	2	8	6	6	4	6	0	2
Cell 32	4	4	0	1	4	1	4	0	1	4	2	4	4	9	0	2	4	5	0	0	0	0	5	0	4	4	3	5	4	6	0	0
Cell 33	3	4	0	2	4	0	4	0	2	9	5	4	4	8	0	2	3	6	0	1	0	2	4	0	5	7	5	8	3	7	0	3
Cell 34	2	4	0	1	0	0	3	0	1	5	4	6	4	5	0	3	4	3	0	1	0	0	2	0	3	4	6	4	3	5	0	0
Cell 35	4	4	0	2	0	4	2	0	2	7	3	4	4	5	0	4	4	9	0	2	0	1	1	0	4	6	2	6	4	4	0	3
Cell 36	4	7	0	2	2	1	1	0	1	9	1	1	4	7	0	0	3	6	0	1	2	0	2	0	2	4	6	9	4	4	0	0
Cell 37	4	3	0	2	0	2	2	0	0	3	5	6	4	4	0	3	4	6	0	3	2	1	2	0	4	4	7	9	3	6	0	1
Cell 38	4	5	0	1	0	0	3	0	4	8	2	5	4	7	0	1	4	4	0	2	4	1	1	0	1	5	3	8	4	6	0	1
Cell 39	3	5	0	2	1	1	3	0	5	4	1	3	4	4	0	1	4	6	0	2	1	0	4	0	5	2	4	6	4	4	0	4
Cell 40	3	3	0	2	4	0	0	0	2	6	3	3	4	5	0	1	4	4	0	2	1	0	1	0	5	6	6	4	4	9	0	0
Cell 41	4	4	0	2	3	2	2	0	5	4	10	4	4	9	0	3	4	5	0	3	0	0	3	0	3	5	1	6	4	6	0	0
Cell 42	4	4	0	2	0	2	3	0	4	5	9	4	4	6	0	0	4	5	0	1	0	0	4	0	5	4	3	5	4	4	0	3
Cell 43	4	3	0	1	0	1	1	0	1	7	2	5	4	7	0	1	4	6	0	1	5	1	4	0	5	4	5	8	4	5	0	2
Cell 44	4	4	0	1	3	2	2	0	4	5	2	4	4	6	0	0	4	4	0	3	4	0	2	0	1	5	1	4	4	5	0	0
Cell 45	4	8	0	2	0	0	1	0	5	5	3	4	4	10	0	0	4	5	0	1	0	1	2	0	1	7	3	1	4	5	0	2
Cell 46	4	4	0	0	0	0	4	0	1	2	2	5	4	4	0	3	4	5	0	1	0	1	5	0	5	5	4	6	3	7	0	7
Cell 47	3	5	0	1	0	1	4	0	4	4	4	7	4	6	0	0	3	4	0	2	4	0	4	0	4	10	3	1	3	4	0	4
Cell 48	4	3	0	0	0	1	3	0	4	4	5	5	4	7	0	2	4	4	0	2	1	0	5	0	4	6	4	4	4	5	0	3
Cell 49	4	9	0	2	1	8	1	0	1	1	5	6	4	4	0	6	4	5	0	1	1	1	3	0	5	4	4	0	6	5	0	2
Cell 50	6	5	0	2	3	1	1	0	0	0	2	5	5	7	0	1	4	4	0	2	2	0	5	0	7	4	4	5	4	7	0	5
Figure 6E - source data
				% cells with >4 centrioles
treatment		time after release (h)		Exp 1	Exp2	Exp3
siControl		0		10	4	2
		8		6	4	8
siTRIM37		0		10	6	8
		8		54	46	56
siCentrobin + siTRIM37		0		8	0	2
		8		20	14	16
siTRIM37 + BI-2536		0		6	0	4
		8		22	12	30
siCentrobin + siTRIM37 + BI-2536		0		12	2	0
		8		6	4	4
Figure 6G - source data
		% cells with >2 HsSAS-6 foci		% cells with >4 Centrin-2 foci
		Exp 1	Exp2	Exp 1	Exp2
siTRIM37		15	12	54	46
siCentrobin + siTRIM37		12.24	13.36	20	14
siTRIM37 + BI-2536		2.72	5.1	22	12
Figure 6 - Supplement 1A - source data
				% cells with Centrobin structures
cell line		treatment		Exp 1	Exp2	Exp3
HeLa		DMSO + siTRIM37		81	87	83
HeLa		Centrinone +siTRIM37		72	86	80
RPE-1		siTRIM37		75	77
RPE-1 HsSAS-6-ko		siTRIM37		74	67
