# Supplementary material for: TRIM37 prevents formation of centriolar protein assemblies by regulating Centrobin
Source: eLife. 2021 Jan 25;10:e62640. doi: 10.7554/eLife.62640 (PMC7870141; doi:10.7554/eLife.62640)
Supplement: Supplementary file 1. — Summary of CLEM analysis of HeLa or RPE-1 cells depleted of TRIM37, with number of GFP foci, as well as corresponding resident centriole/procentriole and Cenpas ultrastructure identified by CLEM. See main text for further details. Note that no distinct ultrastructure was found for 5 Centrin-1:GFP foci in cell 4, perhaps reflecting a technical issue in this case. [file elife-62640-supp1.xlsx]

## Sheet: Sheet1
siTRIM37 Cells			Normal ultrastructures		Cenpas ultrastructures
Number	Type	GFP foci	Centrioles	Procentrioles	Centriole-related	Tiger	Not found
1	HeLa	5	2	0	0	3	0
2	HeLa	6	2	1	2	1	0
3	HeLa	5	2	0	1	2	0
4	HeLa	8	1	1	1	0	5
5	RPE-1	5	2	2	1	0	0
6	RPE-1	5	2	0	0	3	0
7	RPE-1	7	2	0	5	0	0
8	RPE-1	6	2	0	0	3	1
	Total	47	15	4	10	12	6
