# Supplementary material for: TRIM37 prevents formation of centriolar protein assemblies by regulating Centrobin
Source: eLife. 2021 Jan 25;10:e62640. doi: 10.7554/eLife.62640 (PMC7870141; doi:10.7554/eLife.62640)
Supplement: Supplementary file 2. — Table summarizing the statistical analysis show in main Figures and Figures Supplements. Statistical significance was determined with an unpaired Student’s t-test using PRISM software (Graphpad Software Inc). [file elife-62640-supp2.xlsx]

## Sheet: Sheet1
Fig. 1C	siC_vs_siT37	siC_vs_RO3306	siT37_vs_RO3306
	0.063	0.0002	0.0015
Fig. 1G	siC_vs_siT37
	0.0025
Fig. 1S2B	siC_vs_siT37	siC_vs_siT37+T37GFP	siC_vs_siT37+T37GFP_NES	siT37_vs_siT37+T37GFP	siT37_vs_siT37+T37GFP_NES	siT37+T37GFP_vs_siT37+T37GFP_NES
	0.0235	0.2929	0.1429	0.0401	0.0196	0.7327
Fig. 2B	Control_vs_P1_Centrin	Control_vs_P2_Centrin	P1_vs_P2_Centrin	Control_vs_P1_gTubulin	Control_vs_P2_gTubulin	P1_vs_P2_gTubulin
	0.0215	0.0006	0.0547	0.0016	0.005	0.0209
Fig. 2D	Control_vs_P2
	< 0.0001
Fig. 2 E	Control_vs_P2
	0.0001
Fig. 2G	Control_vs_P2
	0.0029
Fig. 2H	Control_vs_P2
	0.0212
Fig. 2J	Control_vs_P2
	< 0.0001
Fig. 3S1B	siC_vs_siT37
	0.0229
Fig. 4E	siC_vs_siT37	siC_vs_siT37+siPLK4	siC_vs_siT37+siCNTROB	siT37_vs_siT37+siPLK4	siT37_vs_siT37+siCNTROB	siT37+siPLK4_vs_siT37+siCNTROB
	< 0.0001	< 0.0001	ns	ns	< 0.0001	< 0.0001
Fig. 4G	CLEM_vs_ExUM
	0.3828
Fig. 4K	siC_0h_vs_siC_8h	siT37_0h_vs_siT37_8h	siC_0h_vs_siT37_8h
	0.0115	0.6199	0.0138
Fig. 4S1B	siC_vs_siT37
	< 0.0001
Fig. 5B	Control_vs_P2
	< 0.0001
Fig. 5D	Control_vs_P2
	< 0.0001
Fig. 5H	siC_vs_siT37	siC_vs_Centrobin-KO	siT37_vs_Centrobin-KO	siT37_vs_siT37 + Centrobin-KO	siC_vs_siT37 + Centrobin-KO	centrobin-KO_vs_siT37 + Centrobin-KO
	< 0.0001	0.6087	0.0001	0.001	0.002	0.006
Fig. 5S1D	siC_vs_siT37	siC_vs_siCentrobin	siC_vs_siT37	siT37_vs_siT37 + siCentrobin	siC_vs_siT37 + siCentrobin	siCentrobin_vs_siT37 + siCentrobin
	0.0194	0.8039	0.0194	0.0455	0.1258	0.1056
Fig. 6A	HeLa	HeLa	HeLa	HeLa	HeLa	HeLa	HeLa	HeLa	HeLa	HeLa	HeLa	HeLa	HeLa	HeLa	HeLa	HeLa	RPE1	RPE1	RPE1	RPE1
	siC_vs_siT37	siC_vs_Centrinone	siC_vs_siHsSAS-6	siC_vs_siSTIL	siC_vs_siCPAP	siC_vs_siSPICE	siT37_vs_siT37 + Centrinone	siT37_vs_siT37+siHsSAS-6	siT37_vs_siT37+siSTIL	siT37_vs_siT37+siCPAP	siT37_vs_siT37+siSPICE	Centrinone_vs_Centrinone+siT37	siS6_vs_siHsSAS-6+siT37	siSTIL_vs_siSTIL+siT37	siCPAP_vs_siCPAP+siT37	siSPICE_vs_siSPICE+siT37	siC_vs_siT37	siC_vs_HsSAS-6-ko	siT37_vs_siT37+HsSAS-6-ko	HsSAS-6-ko_vs_HsSAS-6-ko+siT37
	< 0.0001	< 0.0001	< 0.0001	< 0.0001	< 0.0001	< 0.0001	< 0.0001	< 0.0001	0.8679	0.001	0.9698	0.0081	< 0.0001	< 0.0001	< 0.0001	< 0.0001	< 0.0001	< 0.0001	< 0.0001	< 0.0001
Fig. 6E	0h	8h	8h	8h	8h	8h	8h	8h	8h
	0h_vs_0h (all combinations)	siC_vs_siT37_siCNTROB_BI2536	siC_vs_siT37	siC_vs_siT37+siCNTROB	siC_vs_siT37+BI2536	siT37_vs_siT37+siCNTROB	siT37_vs_siT37+BI2536	siT37_vs_siT37+siCNTROB+BI2536	siT37+siCNTROB_vs_siT37+Bi2536
	ns	ns	0.0001	0.0072	0.0452	0.0006	0.0071	0.0001	ns
Fig. 6G	Cepas	Cepas	Cepas	HsSAS-6	HsSAS-6	HsSAS-6
	siT37_vs_siT37+siCNTROB	siT37_vs_siT37+BI2536	siT37+siCNTROB_vs_siT37+BI2536	siT37_vs_siT37+siCNTROB	siT37_vs_siT37+BI2536	siT37+siCNTROB_vs_siT37+BI2536
	0.0222	0.0356	ns	ns	0.0376	0.0212
Fig. 6S1A	siT37_vs_siT37+HsSAS-6-ko	siT37_vs_siT37+Centrinone
	ns	ns
